# Supplementary material
Source: publisher figshare collection journal article supplement (https://acs.figshare.com/ndownloader/files/6646581)
Supplement: Supplementary file 1 [file 6646581]

LIBRARY_ID	SMILES	SALT_SMILES
4	Cc1cccc(c1)C(=O)NN
5	c1ccc2c(c1)CN=C2N	Cl
14	CNC(=S)Nc1ccc(cc1Cl)Br
17	Cc1cc(ncn1)N1CCCCCC1	Cl
31	CCOC(=O)c1ccc(C)c(c1)N
34	CCc1cccc2cc(CNC3CC3)c(=O)[nH]c12
35	CCC(C)(CN)N1CCOCC1
41	C1CCN(CC1)CC(=O)Nc1ccc2c(c1)OCO2
42	CC(C)Nc1ccccc/c/1=N\C(C)C
48	C1CCN(C1)C(=O)C(=O)Nc1ccc(cn1)Cl
51	c1ccnc(c1)CNc1ccc2c(c1)[nH]c(=O)[nH]2
52	c1cc(ccc1C(=O)CN)Br
54	c1cc(c(cc1C1=NNC2=NCCN2C1)F)F
56	c1cc(cc(c1)Cl)C(C(=O)O)O
58	Cc1cc(CN)n(C)n1
63	CNCc1ccc(Oc2cccnc2)o1
66	c1cc(c2ccc(CN)cn2)oc1
73	c1ccc(c(c1)C(=O)O)O	CCN(CC)C(=C)N
75	C1CC(=NC1)NNC(=O)c1ccc(cc1)Br
78	CCOC(=O)c1ccc(cc1)CN
81	CN(C)c1cccc(c1)C(=O)NN
103	c1cc(ccc1CC(=O)NN)F
109	CCN(CC)c1ccc(cc1)C(=O)NN
112	C1CC(c2ccc3c(c2)OCCO3)NC1
114	C1CCN(C1)c1c(C#N)c(N)[nH]n1
125	CC1CCN(CC1)C(=N)N	OS(=O)(=O)O
131	Cc1cc(C(=O)NCC(F)(F)F)no1
158	CC(C)c1cc(NC(=O)CN2CCC(C)CC2)on1
162	CC(c1cccnc1)NC(=O)CCC(=O)c1cccs1
164	Cc1cc(C)nc(c1C#N)NCCCN1CCOCC1
171	Cc1c(c2nccn2C)sc(N)n1
181	CC1CC(C)CN(C1)Cc1nc(N)nc(n1)N(C)C
189	c1cc(CCN)cnc1
203	CC(C)S(=O)(=O)c1c(N)[nH]nc1SC
205	c1cscc1C(=N)N	Cl
206	c1cc(C(F)(F)F)oc1CN
207	C1CCN(CC1)C(=O)C1CCCNC1	Cl
209	Cc1cc(NCc2cccnc2)no1
211	COC(=O)c1ccc(cc1)CN	Cl
216	c1cc(ccc1C(=N)N)C(F)(F)F	Cl.O.O
218	CCOc1c2cccc(C)c2nc(n1)N=C(N)N
224	Cn1cccc1CNCCc1c[nH]c2ccccc12
227	c1cc(ccc1CBr)C(=O)O
231	Cc1ccc2=NCC(Cn2c1)O
236	CNCc1cc(ccc1Cl)[N+](=O)[O-]	Cl
240	CNCc1nccn1C	Cl.Cl
255	c1ccc(cc1)NC(=O)Cc1cn2ccccc2n1
260	C1CCC(CC1)C(=O)NCC1CCCO1
261	CC(C1CC1)N(C)Cc1nc2ccccc2c(=O)[nH]1
266	CN(C)c1ccc(cn1)C(=O)O
267	Cc1cc(c(C)o1)C(=O)Nc1ccncc1
268	CC1CCC(CC1)NC(=O)C1CCCO1
272	Cc1c(CC(=O)Nc2ccccn2)c(C)n(C)n1
273	CC(=O)N1C=Cc2ccccc2C1CC(=O)N(C)C
274	c1cc(ccc1C(CN)O)F
278	c1ccc(cc1)C1(CC1)C(=O)N1CCCC(C1)O
285	CC(=O)Nc1cccc(c1)CN
286	COc1ccc(cc1O)CN	Cl
290	c1cc(ccc1CSC(=N)N)Cl
291	c1cc2c(cc1NCc1ccncc1)OCCO2
305	CN1B(c2c(ccs2)C(=N1)Cl)O
306	c1ccc(c(c1)CSC(=N)N)Cl
311	COc1ccc(cc1)C1N(C2CC2)C(=O)CS1
321	C1CCC(C1)NCc1ccc2c(c1)OCO2
323	CC1=CC(C)(C)Nc2cc3c(cc12)OCO3
328	Cc1c(C)oc2c1c(=N)n(CCCN(C)C)cn2
330	c1ccc(c(c1)C(=O)NN)Cl
333	CCCn1c2CCCc2c(nc1=O)SC(C)C
337	CC(c1nc(N)nc(n1)N(C)C)N1CCCCCC1
338	CC1CCC(CC1)NC(=O)Cn1ccnc1
